# Supplementary material
Source: PubMed Central journal article supplement (PMC3511076)
Supplement: 1213901109_sapp.pdf [file 1213901109_sapp.pdf]

## Supporting Information

### Text S1. Materials and methods

#### Construction of mutants

We generated unmarked deletions of the phenazine modifying genes *phzH*, *phzM*, *phzS*, the two redundant phenazine biosynthetic operons *phzA1-G1* (*phz1*) and *phzA2-G2* (*phz2*), and the quinolone biosynthetic genes *pqsABC*, *pqsH* and *pqsL* in various combinations in a panel of *P. aeruginosa* PA14 strain backgrounds (supporting table 1). The deletion plasmids for *phzA1-G1* and *phzA2-G2* have been described previously (1). All other deletion plasmids were generated using the yeast gap repair method (2). Here we describe the protocol for generating the unmarked deletion of *phzA2-G2*. All other deletion strains were generated according to a similar protocol. ~1 kb of the sequences flanking the gene(s) to be deleted were amplified using the primer pairs US-1 and US-2 (for the 5' flanking region) and DS-1 and DS-2 (3' flanking region) (supporting table 2). These flanking DNA fragments were joined and integrated into the linearized plasmid pMQ30 by gap repair cloning using the yeast strain InvSc1 (2). The resulting deletion plasmid was transformed into *E. coli* BW29427 and mobilized into PA14 using biparental conjugation. PA14 single recombinants (merodiploid containing the intact allele(s) and the null/deleted allele(s)) were selected on LB agar containing 100 µg/ml gentamicin. Potential deletion mutants were generated by selecting for loss of the plasmid (formation of the double recombinant) by identifying strains that grew in the presence of 10% sucrose (these strains lost the *sacB*-containing plasmid because *sacB* is toxic in the presence of sucrose). Strains with properties of a double recombination were verified by PCR.

## Construction of the GFP-reporter plasmids

Primers for the construction of these plasmids are listed in Table S2A. A SpeI site was engineered into the miniTn7(Gm)<sub>PA1/04/03</sub> *eyfp*-a plasmid in between the KpnI and SphI sites upstream of the *yfp* gene. Next, the multiple cloning site from pUC18-mini Tn7T-Gm-lacZ (3) was amplified with primers 1 and 2. The PCR product was digested with SpeI and SphI and ligated with SpeI/SphI-digested miniTn7(Gm)<sub>PA1/04/03</sub> *eyfp*-a to give pAKN69-MCS. The multiple cloning site from pAKN69-MCS was then amplified with primers 3 and 4. The PCR product was digested with SalI and MfeI and ligated with XhoI and EcoRI digested pYL122 (4). This step replaced the *rhlA* promoter in pYL122 with a multiple cloning site to give pSEK-GFP. The *phzA1* promoter was amplified from *P. aeruginosa* PA14 genomic DNA by PCR with primers 5 and 6. The *phzA2* promoter was amplified from *P. aeruginosa* PA14 genomic DNA by PCR with primers 7 and 8. These PCR products were digested with SpeI and XhoI and ligated with SpeI and XhoI digested pSEK-GFP to give pSEK-*PphzA1*GFP and pSEK-*PphzA2*GFP.

## Genomic integration of the reporter fusions into *P. aeruginosa* PA14

*PphzA1*-GFP and *PphzA2*-GFP fusions were inserted as single-copies into the chromosomal *attB* site in the *P. aeruginosa* PA14 using a modified version of a previously described protocol (4). Briefly, pSEK-*PphzA1*GFP and pSEK-*PphzA2*GFP were transformed into chemically competent *E. coli* BW29427 cells for conjugation with *P. aeruginosa*. Merodiploids were selected with 200 µg/mL tetracycline, and Flp-catalyzed excision of the integrase and Tet<sup>R</sup> cassette was carried out as previously described (5, 6).

## Supporting Table S1.

### Strains and plasmids used in this work

| Strain                                 | Comments/Genotype                                                                               | Source or Reference        |
|----------------------------------------|-------------------------------------------------------------------------------------------------|----------------------------|
| <b><i>Pseudomonas aeruginosa</i></b>   |                                                                                                 |                            |
| PA14                                   | Clinical Isolate, UCBPP-14                                                                      | (7)                        |
| $\Delta phz$                           | PA14 with deletions in the <i>phzA1-G1</i> and the <i>phzA2-G2</i> operons                      | (1)                        |
| $\Delta phz1$                          | PA14 with deletion of the <i>phzA1-G1</i> operon                                                | this study                 |
| $\Delta phz2$                          | PA14 with deletions of the <i>phzA2-G2</i> operon                                               | this study                 |
| $\Delta phzHMS$                        | PA14 with deletions of the <i>phzM</i> , <i>phzH</i> and <i>phzS</i> genes                      | this study                 |
| $\Delta phzHMS\Delta phz1$             | PA14 with deletions of <i>phzM</i> , <i>phzH</i> , <i>phzS</i> genes and <i>phzA1-G1</i> operon | this study                 |
| $\Delta phzHMS\Delta phz2$             | PA14 with deletions of <i>phzM</i> , <i>phzH</i> , <i>phzS</i> genes and <i>phzA2-G2</i> operon | this study                 |
| $\Delta pqsAC$                         | PA14 with deletions of the <i>pqsA-C</i> genes                                                  | this study                 |
| $\Delta pqsR$                          | PA14 with deletion of the <i>pqsR</i> gene                                                      | Deborah Hogan, Hanover, NH |
| $\Delta pqsH$                          | PA14 with deletion of the <i>pqsH</i> gene                                                      | Deborah Hogan Hanover, NH  |
| $\Delta pqsE$                          | PA14 with deletion of the <i>pqsE</i> gene                                                      | this study                 |
| $\Delta pqsL$                          | PA14 with deletion of the <i>pqsL</i> gene                                                      | this study                 |
| $\Delta pqsHL$                         | PA14 with deletions of the <i>pqsH</i> and <i>pqsL</i> genes                                    | this study                 |
| $\Delta pqsAC\Delta phzHMS\Delta phz1$ | PA14 with deletions of the <i>pqsA-C</i> genes in the $\Delta HMS1$ background                  | this study                 |
| $\Delta pqsAC\Delta phzHMS\Delta phz2$ | PA14 with deletions of the <i>pqsA-C</i> genes in the $\Delta HMS2$ background                  | this study                 |
| $\Delta pqsH\Delta phzHMS\Delta phz1$  | PA14 with deletions of the <i>pqsH</i> gene in the $\Delta HMS1$ background                     | this study                 |
| $\Delta pqsL\Delta phzHMS\Delta phz1$  | PA14 with deletions of the <i>pqsL</i> gene in the $\Delta HMS1$ background                     | this study                 |
| $\Delta pqsHL\Delta phzHMS\Delta phz1$ | PA14 with deletions of the <i>pqsH</i> and <i>pqsL</i> genes in the $\Delta HMS1$ background    | this study                 |
| WT PmcsGFP                             | PA14 with GFP insert with no promoter in the multiple cloning site                              | this study                 |
| WT P <i>phzA1</i> GFP                  | PA14 with P <i>phzA1</i> GFP insert                                                             | this study                 |
| WT P <i>phzA2</i> GFP                  | PA14 with P <i>phzA2</i> GFP insert                                                             | this study                 |
| $\Delta pqsAC$ P <i>phzA2</i> GFP      | $\Delta pqsAC$ with P <i>phzA2</i> GFP insert                                                   | this study                 |
| $\Delta pqsR$ P <i>phzA2</i> GFP       | $\Delta pqsR$ with P <i>phzA2</i> GFP insert                                                    | this study                 |
| $\Delta pqsHL$ P <i>phzA2</i> GFP      | $\Delta pqsHL$ with P <i>phzA2</i> GFP insert                                                   | this study                 |

|                                        |                                                                                                                                                                                                                                                                |                                    |
|----------------------------------------|----------------------------------------------------------------------------------------------------------------------------------------------------------------------------------------------------------------------------------------------------------------|------------------------------------|
| $\Delta phz2$ pUCP18                   | $\Delta phz2$ with pUCP18 plasmid inserted                                                                                                                                                                                                                     | this study                         |
| $\Delta phz2$ pUCP18- <i>phz2</i>      | $\Delta phz2$ with pUCP18 plasmid with <i>phz2</i> insert                                                                                                                                                                                                      | this study                         |
| <b><i>Escherichia coli</i></b>         |                                                                                                                                                                                                                                                                |                                    |
| UQ950                                  | <i>E. coli</i> DH5 $\alpha$ $\lambda$ (pir) host for cloning; F- $\Delta$ ( <i>argF-lac</i> )169 $\Phi$ 80 <i>dlacZ58</i> ( $\Delta$ M15) <i>glnV44</i> (AS) <i>rfbD1 gyrA96</i> (Nal <sup>R</sup> ) <i>recA1 endA1 spoT1 thi-1 hsdR17 deoR</i> $\lambda$ pir+ | D. Lies, Caltech                   |
| BW29427                                | Donor strain for conjugation: <i>thrB1004 pro thi rpsL hsdS lacZ</i> $\Delta$ M15RP4–1360 $\Delta$ ( <i>araBAD</i> )567 $\Delta$ <i>dapA1341::[erm pir(wt)]</i>                                                                                                | W. Metcalf, University of Illinois |
| <b><i>Saccharomyces cerevisiae</i></b> |                                                                                                                                                                                                                                                                |                                    |
| InvSc1                                 | Used for yeast gap repair cloning                                                                                                                                                                                                                              | (2)                                |

| Plasmids                                          | Description                                                                                                     | Source     |
|---------------------------------------------------|-----------------------------------------------------------------------------------------------------------------|------------|
| pUCP18                                            | Multi-copy plasmid with ColEI ORI; Amp <sup>R</sup> ; <i>lacZ</i> $\alpha$ gene                                 | (8)        |
| pUCP18- <i>phz2</i>                               | pUCP18 plasmid with <i>phz2</i> operon inserted                                                                 | this study |
| pUC18-mini Tn7T-Gm-lacZ                           | Broad host plasmid with mini Tn7T-Gm <sup>R</sup> -lacZ                                                         | (3)        |
| miniTn7(Gm)P <sub>A1/04/03</sub><br><i>eyfp-a</i> | Integration vector containing <i>eyfp</i> , Gm <sup>R</sup>                                                     | (9)        |
| pAKN69-MCS                                        | Integration vector containing multiple cloning site (MCS)                                                       | this study |
| pYL122                                            | <i>rhlAB::gfp</i> transcriptional reporter on mini-CTX, Tet <sup>R</sup>                                        | (4)        |
| pSEK-GFP                                          | GFP reporter plasmid containing MCS                                                                             | this study |
| pSEK-P <i>phzA1</i> GFP                           | GFP reporter plasmid with <i>phzA1</i> inserted                                                                 | this study |
| pSEK-P <i>phzA2</i> GFP                           | GFP reporter plasmid with <i>phzA2</i> inserted                                                                 | this study |
| pMQ30                                             | Yeast-based allelic exchange vector, <i>sacB</i> , <sup>a</sup> CEN/ARSH, URA3 <sup>+</sup> , Gent <sup>R</sup> | (2)        |
| pLD338                                            | <i>phzM</i> deletion fragments cloned into pMQ30                                                                | this study |
| pLD294                                            | <i>phzS</i> deletion fragments cloned into pMQ30                                                                | this study |
| pLD741                                            | <i>phzH</i> deletion fragments cloned into pMQ30                                                                | this study |
| pLD11                                             | <i>phz1</i> deletion fragments cloned into pSMV10                                                               | (1)        |
| pLD18                                             | <i>phz2</i> deletion fragments cloned into pSMV10                                                               | (1)        |
| pLD710                                            | <i>pqsABC</i> deletion fragments cloned into pMQ30                                                              | this study |
| pLD1140                                           | <i>pqsH</i> deletion fragments cloned into pMQ30                                                                | this study |
| pLD706                                            | <i>pqsL</i> deletion fragments cloned into pMQ30                                                                | this study |

## Supporting Table S2.

### A. Primers for fluorescent reporter constructs

| <b>Construction of pAKN69-MCS</b>     |                                              |
|---------------------------------------|----------------------------------------------|
| 1. <i>speI</i> -MCS-FOR               | TGCCCGAGGCATAGACTGTA                         |
| 2. <i>sphI</i> -MCS-REV               | ggatg <u>gcatgc</u> CTGTTTCCTGTGTGATAAAGAAAG |
| <b>Construction of pSEK-GFP</b>       |                                              |
| 3. <i>sall</i> -MCS-FOR               | tgaggt <u>cgac</u> TACCGCCACCTAACAAATTCG     |
| 4. <i>mfel</i> -MCS-REV               | tcgac <u>aattg</u> TACCGGGCCCAAGCTTCT        |
| <b>Construction of pSEK-PphzA1GFP</b> |                                              |
| 5. <i>speI</i> -PphzA1-FOR            | cgcc <u>actagt</u> TTCCTGCGTACCGAAAGAAT      |
| 6. <i>xhoI</i> -PphzA1-REV            | cgag <u>ctcgag</u> CGAGAGGGCTCTCCAGGTAT      |
| <b>Construction of pSEK-PphzA2GFP</b> |                                              |
| 7. <i>speI</i> -PphzA2-FOR            | cgcc <u>actagt</u> GCCTGCTCAACTGAATCGAC      |
| 8. <i>xhoI</i> -PphzA2-REV            | cgag <u>ctcgag</u> AGTTCGAATCGACTGGCATC      |

### B. Primers for deletion strains

| <b>pqsABC deletion strains</b> |                                                                |
|--------------------------------|----------------------------------------------------------------|
| pqsABC-US-1                    | ggaattgtgagcggataacaatttcacacaggaacagctAGAGGCTCCGATCACCCCTAT   |
| pqsABC-US-2                    | ctcagcacaccagcacctcGTCTGGCCCCGATAGTGATA                        |
| pqsABC-DS-3                    | tatcactatcggggccagacGAGGTGCTGGTGTGCTGAG                        |
| pqsABC-DS-4                    | ccaggcaaattctgttttatcagaccgcttctgcgttCTGAACCGTAGGTCAGGACCAG    |
| <b>pqsL deletion strains</b>   |                                                                |
| pqsL-US-1                      | ggaattgtgagcggataacaatttcacacaggaacagctCGCCTGTTCTCAAGTACG      |
| pqsL-US-2                      | gctgataggaacgctcgcCCTGCTCCACTACCACCAC                          |
| pqsL-DS-3                      | gtggtgtagtgagcaggGCGAGCGTTCCTATCAGC                            |
| pqsL-DS-4                      | ccaggcaaattctgttttatcagaccgcttctgcgttCTCGAACAGGTGTTCTCAATC     |
| <b>pqsH deletion strains</b>   |                                                                |
| pqsH-US-1                      | ggaattgtgagcggataacaatttcacacaggaacagctGATATCCACATCCACGGTGTC   |
| pqsH-US-2                      | tattcctcagccagacgctcGATGCCTGCCTTGGTGAAT                        |
| pqsH-DS-3                      | attaccaaggcaggcatcCTGAGGAATACCCTCGTTCCG                        |
| pqsH-DS-4                      | ccaggcaaattctgttttatcagaccgcttctgcgttctgatGGAGATGCTCTGCACCTTGT |
| <b>pqsE deletion strains</b>   |                                                                |
| pqsE-US-1                      | ggaattgtgagcggataacaatttcacacaggaacagctGCAATCATGACCTGGTAGGG    |

|                                     |                                                              |
|-------------------------------------|--------------------------------------------------------------|
| pqsE-US-2                           | atgctccccaggtgcagtCCAACAGGCACAGGTCATC                        |
| pqsE-DS-3                           | gatgacctgtgcctgttgACTGCACCTGGGGAGCAT                         |
| pqsE-DS-4                           | ccaggcaaattctgtttatcagaccgcttctgcgttCTGACAGGCACAACCTGGCGATAG |
| <b><i>phzH</i> deletion strains</b> |                                                              |
| phzH-US-1                           | ggaattgtgagcggataacaattcacacaggaaacagctGTTTCGACCAAGGAGGTCAG  |
| phzH-US-2                           | gctcacctgggtgttgaagtGTATCGGTCATGGCGAAGAT                     |
| phzH-DS-3                           | atcttcgcatgaccgatacACTTCAACACCCAGGTGAGC                      |
| phzH-DS-4                           | ccaggcaaattctgtttatcagaccgcttctgcgttCTGATCGCTTCCTCGACTCCATC  |
| <b><i>phzM</i> deletion strains</b> |                                                              |
| phzM-US-1                           | ggaattgtgagcggataacaattcacacaggaaacagctCACTCGACCCAGAAGTGTT   |
| phzM-US-2                           | gttgagagtccggtcaggTATCAAATTACGCGCAGCAG                       |
| phzM-DS-3                           | ctgctgcgcgtaattgataCCTGAACCGGAACTCTCAAC                      |
| phzM-DS-4                           | ccaggcaaattctgtttatcagaccgcttctgcgttctgatGCTGGTACGCCTGAGCAT  |
| <b><i>phzS</i> deletion strains</b> |                                                              |
| phzS-US-1                           | ggaattgtgagcggataacaattcacacaggaaacagctAAGGTCAACGCGGTACAGAT  |
| phzS-US-2                           | ccatcgatatcctcattgccGCGACCGAAGACTGAGAAGA                     |
| phzS-DS-3                           | tcttctcagtctcggtcgcGGCAATGAGGATATCGATGG                      |
| phzS-DS-4                           | ccaggcaaattctgtttatcagaccgcttctgcgttctgatACGCGAACATTTCCGAGTC |

Capital letters indicate bases that anneal to the template. Restriction sites are in italic type and underlined.

## Supporting Figure S1

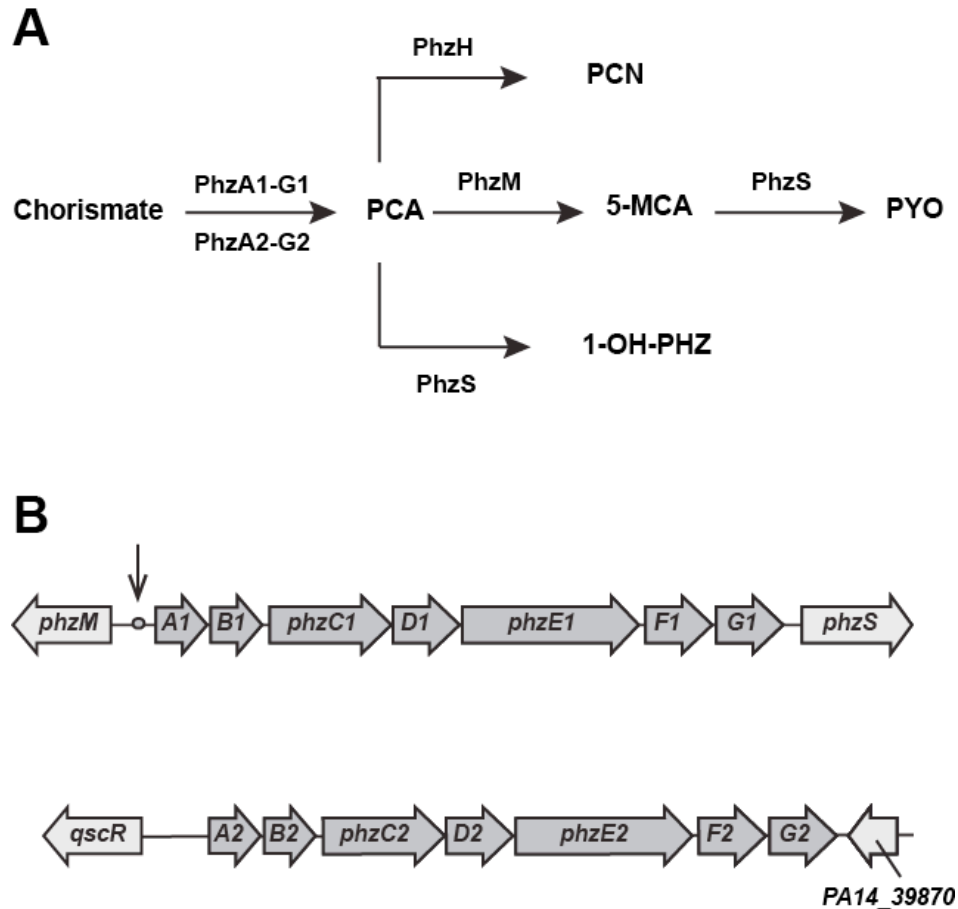

**Supporting Figure 1 (Fig. S1). (A) Phenazine biosynthetic pathway.** PCN, phenazine-1-carboxamide; 5-MCA, 5-methyl PCA; 1-OH-PHZ, 1-hydroxyphenazine. **(B) Genomic arrangement of the *phzA1-G1* (*phz1*) and *phzA2-G2* (*phz2*) operons and their surrounding regions.** *phz1* is flanked by *phzM* and *phzS*, which encode the enzymes that convert PCA to pyocyanin (PYO). The arrow indicates the location of the *las* box upstream of *phz1*. *phz2* is flanked by *qscR*, which encodes a transcription factor that senses acyl-homoserine lactones, and *PA14\_39870*, which encodes a protein of unknown function that contains a HIT domain, characteristic of a superfamily of hydrolases and transferases.

## Supporting Figure S2

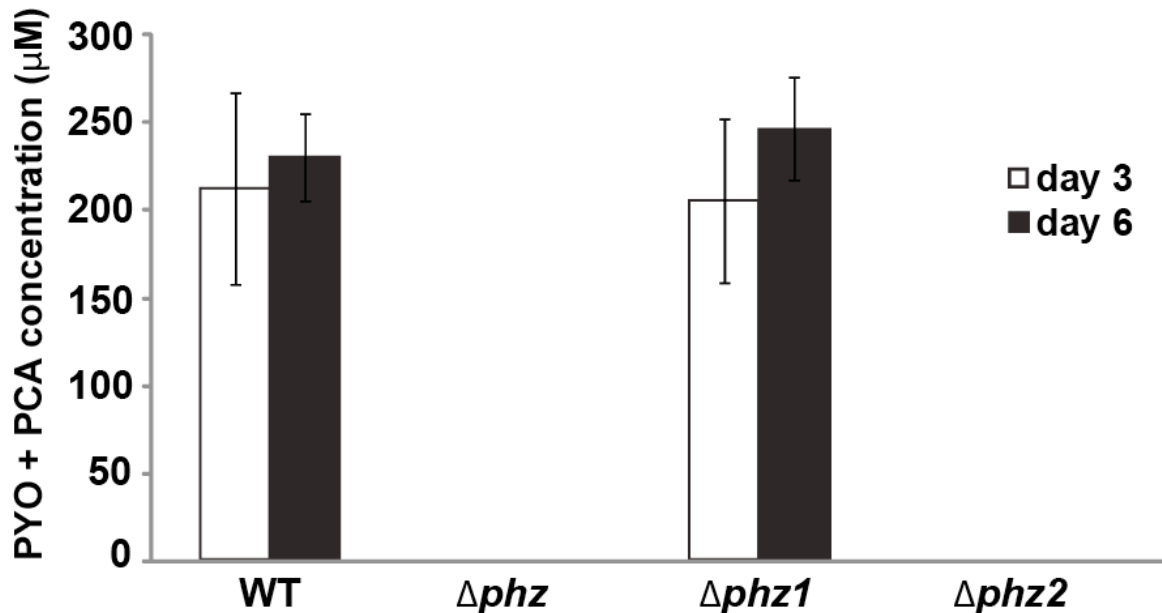

**Supporting Figure 2 (Fig. S2). HPLC quantification of PYO and PCA from colonies grown on 1% tryptone/1% agar plates.** Quantification of phenazines extracted from the agar on which biofilms were grown for three or six days. The PYO+PCA (combined concentration of PCA and PYO) from wild type are similar to that of the  $\Delta phz1$  strain, indicating that the *phz2* operon is sufficient for production of wild-type levels of these phenazines. Error bars indicate standard deviation of three independent experiments.



### Supporting Figure S3

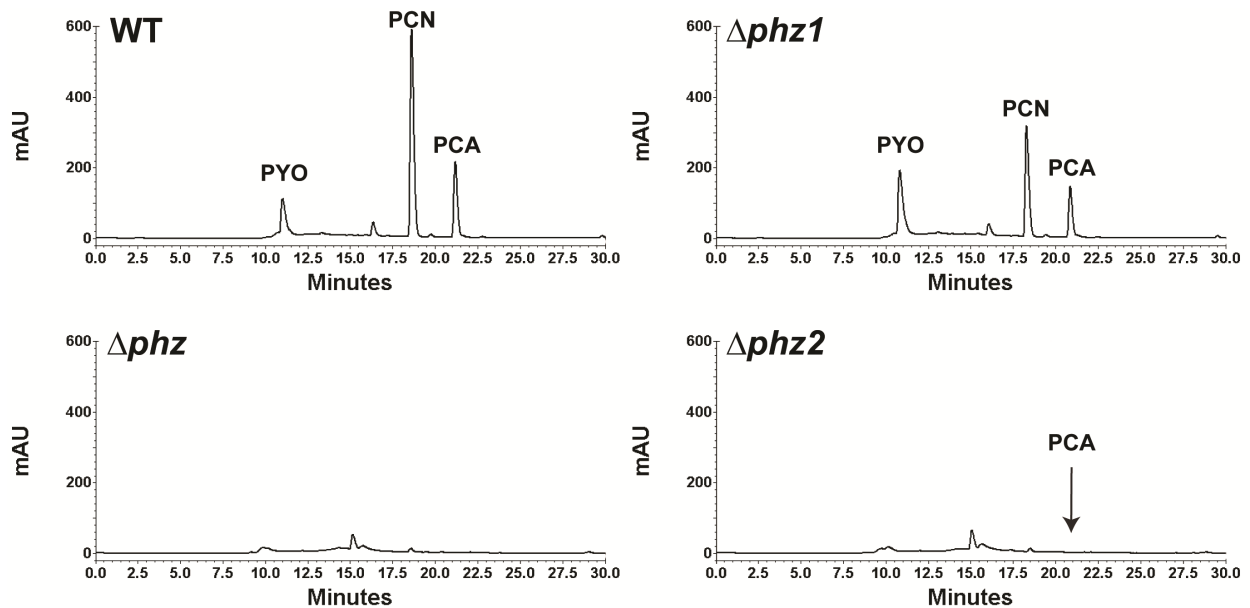

**Supporting Figure 3 (Fig. S3). HPLC traces of phenazines extracted from colony biofilms after six days.** Phenazines were extracted from agar and submitted to HPLC analysis for separation and quantification at a wavelength of 366 nm. Wild type produced the phenazines PYO, PCN and PCA. The  $\Delta phz$  and  $\Delta phz2$  strains did not produce detectable levels of any phenazines (arrow indicates where PCA peak would be expected in the  $\Delta phz2$  strain). This suggests that *phz2* is necessary for phenazine production in biofilms. HPLC conditions and protocol were adapted from (1). Observed retention times for PYO and PCA agree with their results (~10 min and ~20 min respectively).

## Supporting Figure S4

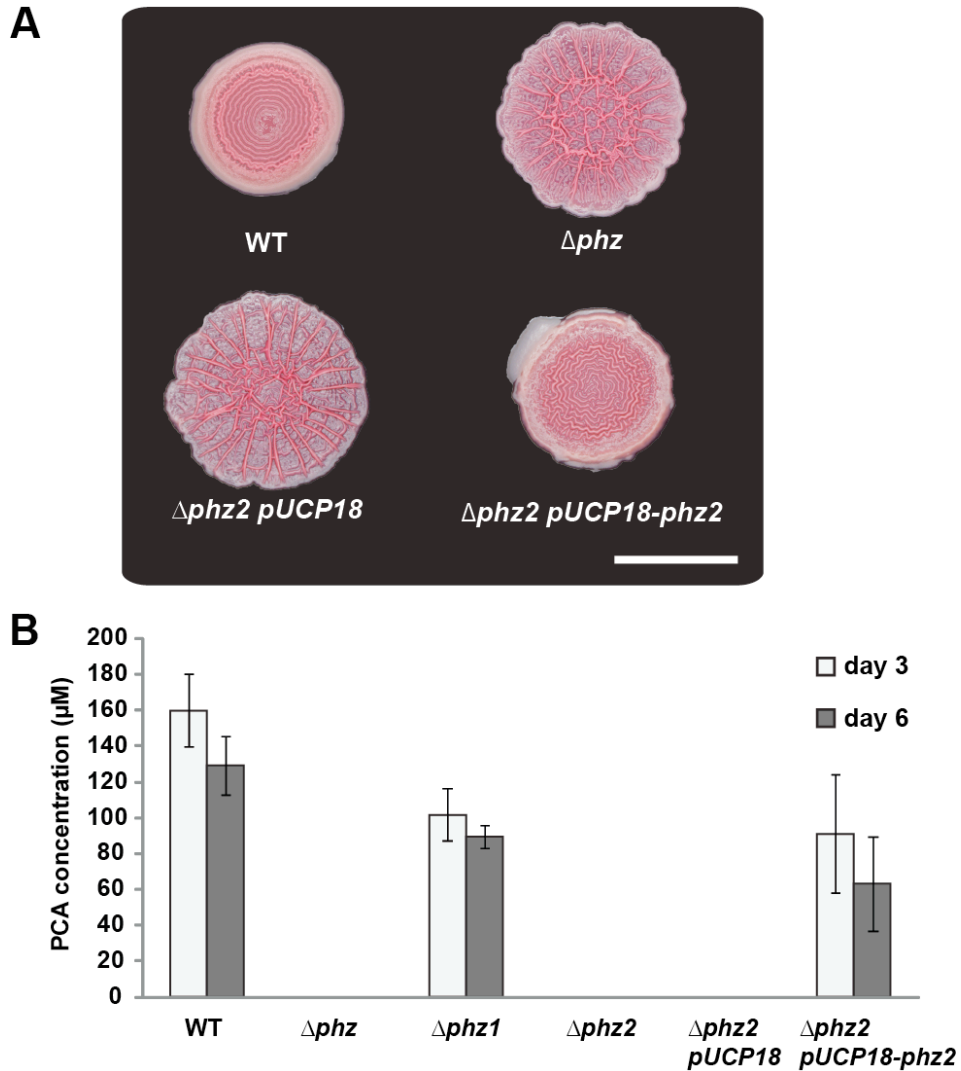

**Supporting Figure 4 (Fig. S4). Complementation with *phz2* restores PCA production and restores wild type colony morphology.** The *phz2* complementation strain was made by inserting a multi-copy plasmid containing the entire *phz2* operon into the  $\Delta phz2$  mutant. (A) Colony morphology assay for wild type,  $\Delta phz$ , control strain containing empty vector ( $\Delta phz2$ -pUCP18), and complemented  $\Delta phz2$ . Colonies were grown for three days. Scale bar is 1 cm. (B) Quantification of PCA production from deletion and complemented strains shows that complementation with *phz2* restores PCA production. Error bars indicate standard deviation of three independent experiments.

## Supporting Figure S5

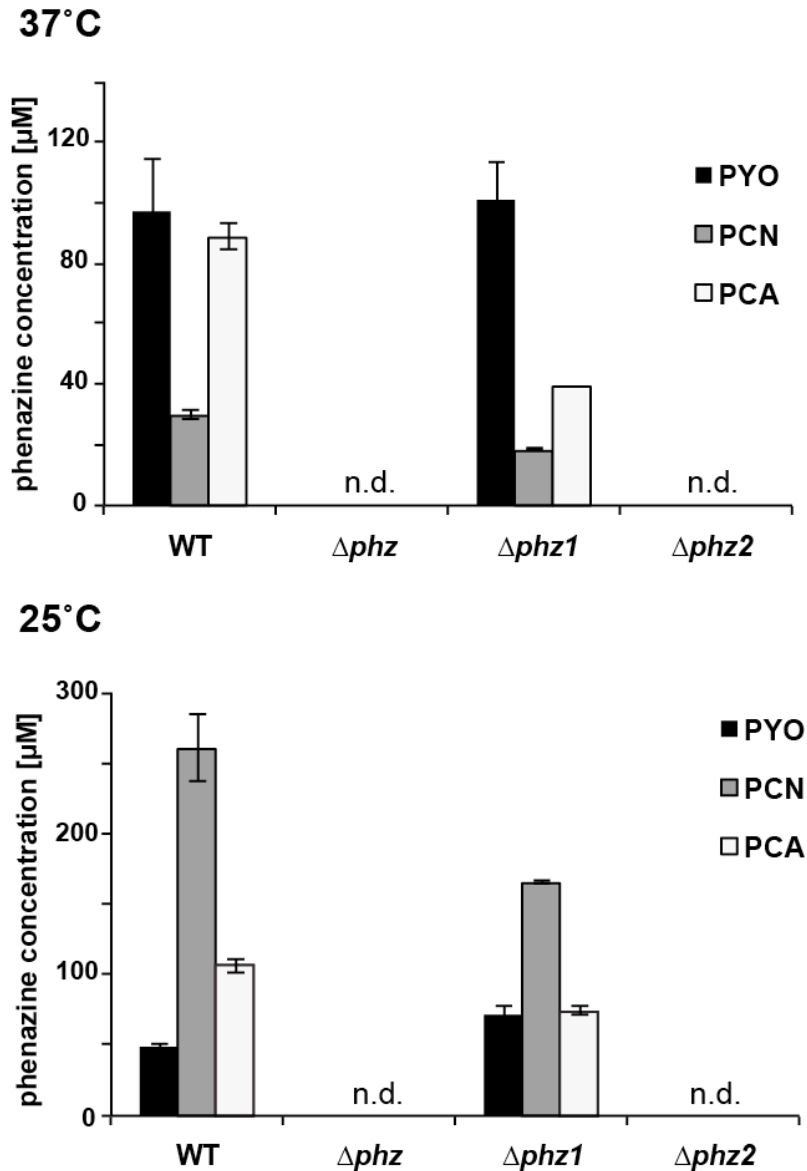

**Supporting Figure 5 (Fig. S5). Effect of temperature on phenazine production.** WT,  $\Delta phz$ ,  $\Delta phz1$ ,  $\Delta phz2$  colonies were grown for 3 days on 1% tryptone, 1% agar at 25°C and 37°C. Phenazines were extracted from the agar into water and analyzed by HPLC. Phenazines could not be detected (n.d.) for  $\Delta phz$  and  $\Delta phz2$  colonies. Error bars indicate standard deviation of biological triplicates.

## Supporting Figure S6

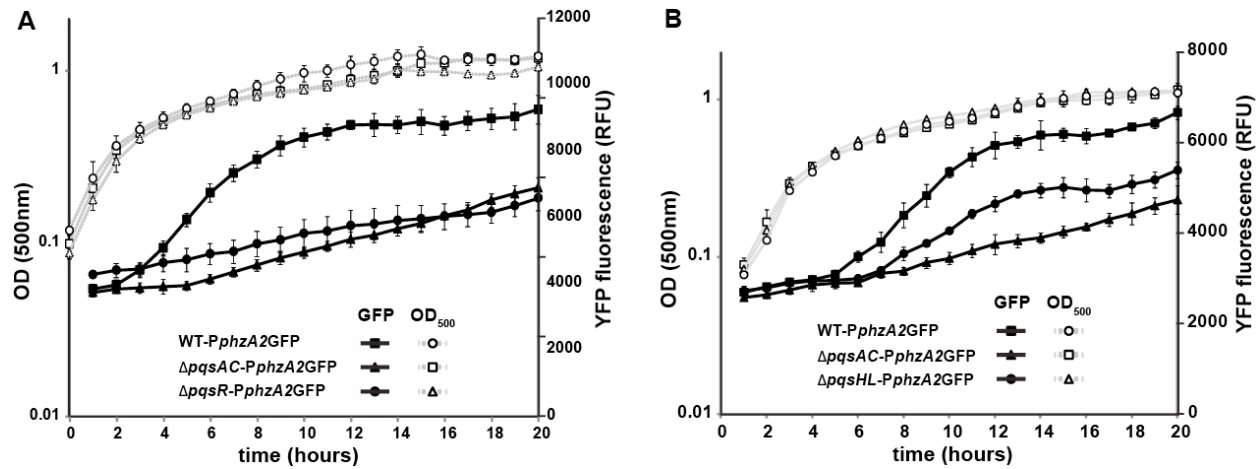

**Supporting Figure 6 (Fig. S6). HHQ positively regulates the expression of *phz2* in planktonic cultures.** We assayed for expression of the *phz2* operon using a GFP-reporter fusion containing the 500 bp region upstream of *phz2*. We integrated this reporter into the wild type,  $\Delta pqsAC$  (no quinolones) and  $\Delta pqsHL$  (HHQ only) strains and monitored growth and GFP expression in planktonic cultures for 20 hours. (A) Quinolone signaling is necessary for wild-type expression of *phz2* as  $\Delta pqsAC$ -*PphzA2GFP* and  $\Delta pqsR$ -*PphzA2GFP* exhibited a severe reduction in *phz2* expression. (B) Quinolone-dependent expression of *phz2* is achieved specifically through HHQ. The  $\Delta pqsHL$ -*PphzA2GFP* strain produces HHQ (but no PQS or HQNO) and is able to induce expression of *phz2* although not to wild type levels. Error bars represent the standard deviation of one experiment performed in biological triplicates. Experiment was repeated three additional times with similar results.

Supporting Figure S7

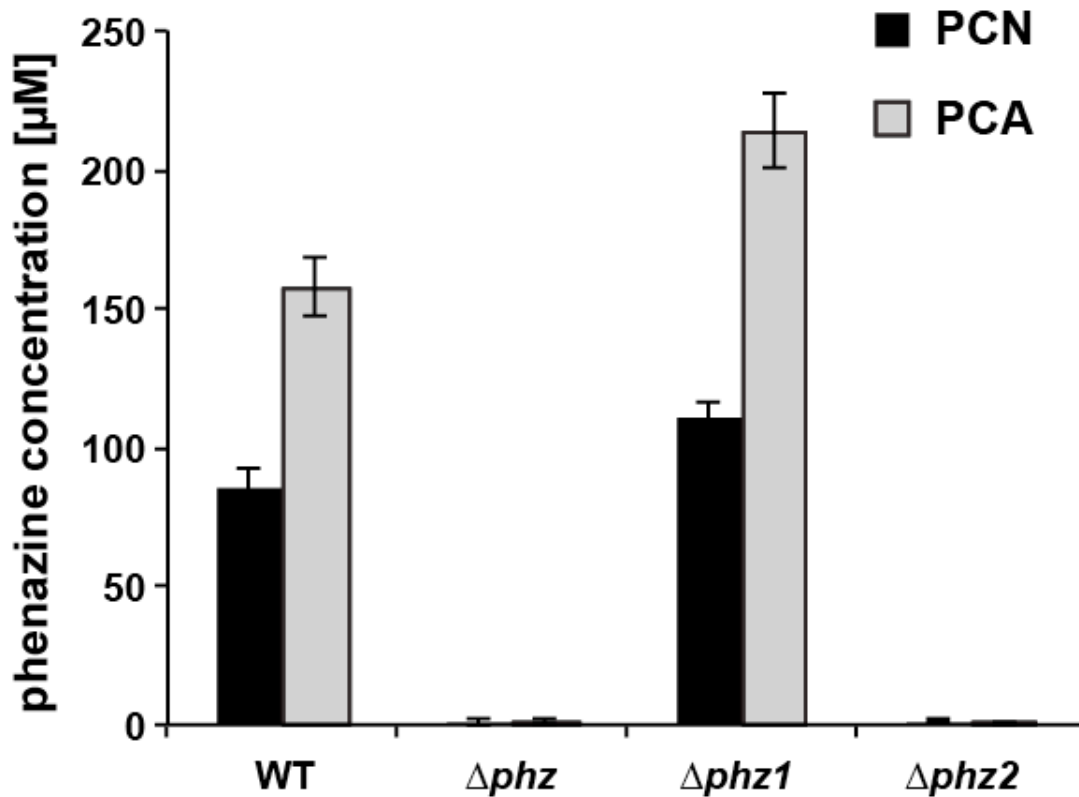

**Supporting Figure 7 (Fig. S7). *phz2* is expressed under anaerobic conditions.** WT, Δ*phz*, Δ*phz1*, Δ*phz2* colonies were grown on 1% tryptone, 1% agar supplemented with 40 mM potassium nitrate in an anaerobic glove box filled with 80% N<sub>2</sub>, 15% CO<sub>2</sub> and 5% H<sub>2</sub> (Coy) for five days. Phenazines were extracted from the agar into water and analyzed by HPLC. Error bars indicate standard deviation of biological triplicates.

## References for Supporting Information

1. Dietrich LE, Price-Whelan A, Petersen A, Whiteley M, & Newman DK (2006) The phenazine pyocyanin is a terminal signalling factor in the quorum sensing network of *Pseudomonas aeruginosa*. *Mol Microbiol* 61(5):1308-1321.
2. Shanks RM, Caiazza NC, Hinsa SM, Toutain CM, & O'Toole GA (2006) *Saccharomyces cerevisiae*-based molecular tool kit for manipulation of genes from gram-negative bacteria. *Appl Environ Microbiol* 72(7):5027-5036.
3. Choi KH & Schweizer HP (2006) mini-Tn7 insertion in bacteria with single attTn7 sites: example *Pseudomonas aeruginosa*. *Nat Protoc* 1(1):153-161.
4. Lequette Y & Greenberg EP (2005) Timing and localization of rhamnolipid synthesis gene expression in *Pseudomonas aeruginosa* biofilms. *J Bacteriol* 187(1):37-44.
5. Handfield M, *et al.* (1998) ASD-GFP vectors for in vivo expression technology in *Pseudomonas aeruginosa* and other gram-negative bacteria. *Biotechniques* 24(2):261-264.
6. Hoang TT, Kutchma AJ, Becher A, & Schweizer HP (2000) Integration-proficient plasmids for *Pseudomonas aeruginosa*: site-specific integration and use for engineering of reporter and expression strains. *Plasmid* 43(1):59-72.
7. Rahme LG, *et al.* (1995) Common virulence factors for bacterial pathogenicity in plants and animals. *Science* 268(5219):1899-1902.
8. Schweizer HP (1991) *Escherichia-Pseudomonas* shuttle vectors derived from pUC18/19. *Gene* 97(1):109-121.

9. Lambertsen L, Sternberg C, & Molin S (2004) Mini-Tn7 transposons for site-specific tagging of bacteria with fluorescent proteins. *Environ Microbiol* 6(7): 726-732.
